# Supplementary material
Source: Research Square preprint supplement (doi:10.21203/rs.3.rs-10301699/v1)
Supplement: Supplementary file 1 [file 1dd6a3f32f03d8ac395c1543.docx]

**Table 1**: Demographic and clinical characteristics of patients with benign brain tumors who underwent proton therapy are presented for the total cohort at baseline (n = 126) and for those who completed the 5-year follow-up (n = 77).

| **Variable** | **Baseline (n=126)** | **5 years**  **(n=77)** |  |
| --- | --- | --- | --- |
| **Age** (mean, (SD))  (median (range)) | 55.3 (13.6) 56 (22; 80) | 56.5 (12.7)  57 (28; 74) |
| **Sex** |  |  |  |
| Male | 43 (34.1%) | 24 (31.2%) |  |
| Female | 83 (65.9%) | 53 (68.8%) |  |
| **Marital status** |  |  |  |
| Married / Cohabiting (living with a partner) | 90 (71.4%) | 59 (76.6%) |  |
| Living alone (single household) | 36 (28.6%) | 18 (23.4%) |  |
| **Employment status** |  |  |  |
| Employed / Student | 85 (67.5%) | 50 (64.9%) |  |
| Retired / Disability pension / Unemployed / No occupation | 41 (32.5%) | 27 (35.1%) |  |
| **Education level** |  |  |  |
| Compulsory school | 17 (13.6%) | 9 (11.8%) |  |
| Upper secondary / Vocational school | 60 (48.0%) | 36 (47.4%) |  |
| University / Higher education (College) | 48 (38.4%) | 31 (40.8%) |  |
| **Diagnoses** |  |  |  |
| Benign neoplasm of meninges | 107 (84.9%) | 69 (89.6%) |  |
| Benign neoplasm of brain and other parts of central nervous system | 10 (7.9%) |  |  |
| Benign neoplasm of thyroid gland | 3 (2.4%) | 2 (2.6%) |  |
| Benign neoplasm of other and unspecified endocrine glands | 5 (4.0%) | 3 (6.5%) |  |
| Neoplasm of uncertain or unknown behaviour of endocrine glands | 1 (0.8%) |  |  |
| For categorical variables n (%) is presented. For continuous variables Mean (SD) / Median (Min; Max) / n= is presented. | | |  |
